# Supplementary material for: A Novel Variant in CMAH Is Associated with Blood Type AB in Ragdoll Cats
Source: PubMed Central journal article supplement (PMC4865243; doi:10.1371/journal.pone.0154973), 2016-05-12

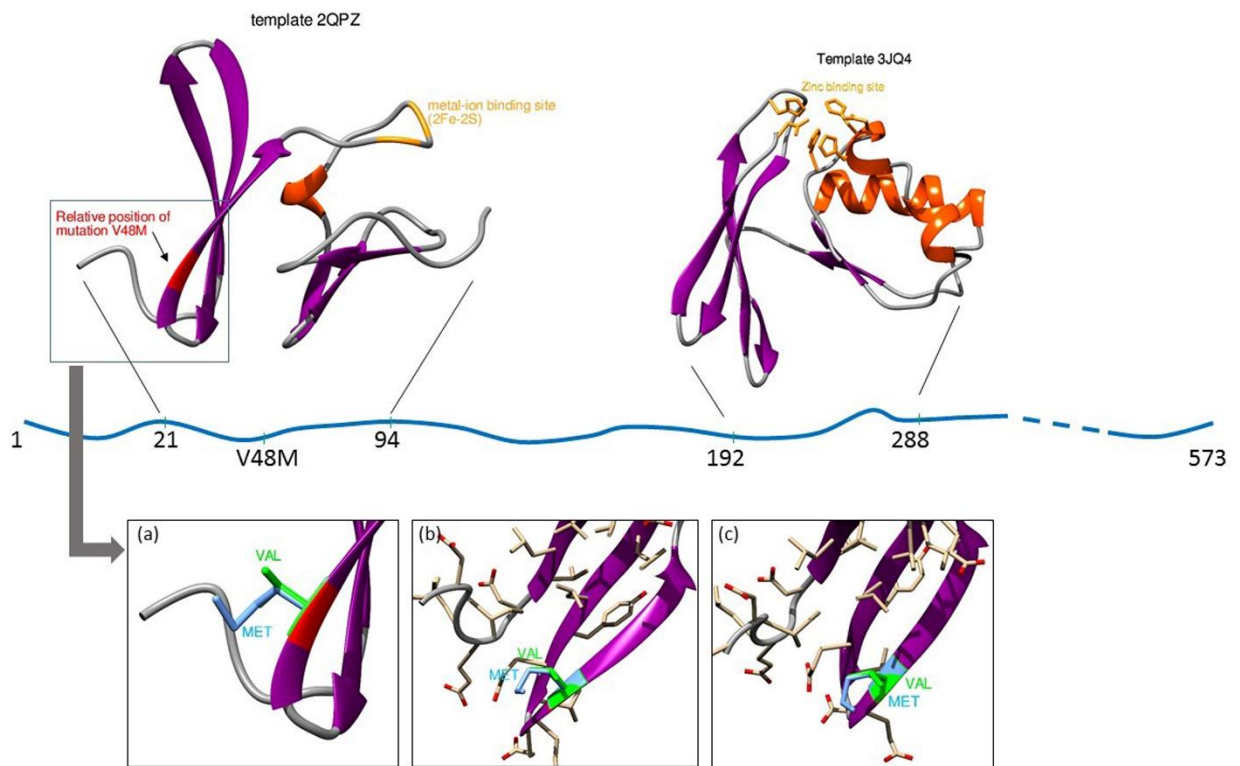

Supplement: pone.0154973.s004.pdf [file pone.0154973.s004.pdf]
