# Supplementary material for: A Novel Variant in CMAH Is Associated with Blood Type AB in Ragdoll Cats
Source: PubMed Central journal article supplement (PMC4865243; doi:10.1371/journal.pone.0154973), 2016-05-12
Supplement: pone.0154973.s005.pdf [file pone.0154973.s005.pdf]

**S1 Table.** Details of five highest associated locations of SNPs to *CMAH* that remained genome-wide significant after permutation testing.

| Chromosome | SNP ID          | 6.2 assembly position | $P_{raw}$ | $P_{genome}$ |
|------------|-----------------|-----------------------|-----------|--------------|
| B2         | chrB2.4545019   | 4487432               | 2.50e-10  | 0.00001      |
| B2         | chrB2.4625051   | 4449822               | 4.28e-5   | 0.004        |
| B1         | chrB1.122267584 | 99024960              | 8.10e-5   | 0.31         |
| B1         | chrB1.222834707 | 198985796             | 2.04e-5   | 0.56         |
| C2         | ChrC2.95368178  | 85312236              | 3.32e-5   | 0.71         |
