# Supplementary material for: A Novel Variant in CMAH Is Associated with Blood Type AB in Ragdoll Cats
Source: PubMed Central journal article supplement (PMC4865243; doi:10.1371/journal.pone.0154973), 2016-05-12
Supplement: pone.0154973.s007.pdf [file pone.0154973.s007.pdf]

**S3 Table.** DNA SNP analyses of *CMAH* in type A and AB cats.

|             |      | $\Delta$ -53<br>18bp | E2<br>c.142 | E3<br>c.268 | I3<br>c.307<br>+22 | E4<br>c.327 | E7<br>c.88<br>4 | I9<br>c.111<br>2+29 | I9<br>c.111<br>2+66 | I9<br>C.111<br>3-70 | E11<br>c.126<br>9 | E11<br>c.139<br>8 | E13 c.1603 |
|-------------|------|----------------------|-------------|-------------|--------------------|-------------|-----------------|---------------------|---------------------|---------------------|-------------------|-------------------|------------|
| Breed       | Type | del                  | G>A         | T>A         | A>G                | A>C         | G>A             | T>G                 | G>A                 | G>A                 | A>G               | G>T               | G>A        |
| Devon rex   | AB   | NP                   | R           | W           | R                  | M           | G               | T                   | R                   | W                   | A                 | K                 | R          |
| Devon rex   | AB   | NP                   | R           | W           | R                  | M           | G               | T                   | R                   | W                   | A                 | K                 | R          |
| British SH  | AB   | NP                   | R           | W           | R                  | M           | G               | T                   | R                   | W                   | A                 | K                 | R          |
| Random bred | AB   | NP                   | R           | W           | R                  | C           | R               | K                   | G                   | W                   | A                 | K                 | R          |
| Random bred | A    | NN                   | G           | T           | R                  | A           | G               | T                   | R                   | A                   | R                 | G                 | G          |
| Trace       | A    | NN                   | G           | T           | A                  | A           | G               | T                   | G                   | A                   | G                 | G                 | G          |
| AA change   |      |                      | V48M        | Y90N        |                    | P109S       |                 | -                   | -                   |                     | -                 | -                 | D535N      |
