# Supplementary material for: A Novel Variant in CMAH Is Associated with Blood Type AB in Ragdoll Cats
Source: PubMed Central journal article supplement (PMC4865243; doi:10.1371/journal.pone.0154973), 2016-05-12
Supplement: pone.0154973.s009.pdf [file pone.0154973.s009.pdf]

**S5 Table.** Primers sequences for *CMAH* analysis and genotyping.

| <i>Genomic analysis</i> |                                      |                                  |
|-------------------------|--------------------------------------|----------------------------------|
| CMAH region             | Forward primer                       | Reverse primer                   |
| Exon 1                  | ttccttgctgctggagtg                   | gctctgctgctcsgtggtg              |
| Exon 2*                 | tgagcaagcagagcgtgcat                 | ctaagtgagcacacacgaagattatgaatt   |
| Exon 3                  | ggtgctcaagcccctcatthaa               | tggtcacagtctgtcctaggcac          |
| Exon 4 <sup>§</sup>     | cccttgatttttggtactctgtgtac           | taatacacacacataaatggacatcttag    |
| Exon 5                  | taaaaccaaccgggagagtttctat            | acacatgaaaactgtatgatattcgca      |
| Exon 6-7                | ggagcaaactgtctcttactagggtga          | gaaatgaagatagtagaagatggftatcactc |
| Exon 8                  | ttccttggatagaagtaattcttctctgat       | gttcccagttaagactgtaaacttcttg     |
| Exon 9                  | agagagcactttcactcatgacaca            | agacaatctctgtaattggattctagct     |
| Exon 10                 | aagacaaagtataagtacaacttctggactaa     | acaagacttaataattcctacaaacgagg    |
| Exon 11                 | caaaagatgtggagtttcccatagt            | acaatctgtgggacaagaatgct          |
| Exon 12                 | gagggactatacgaactccaattcatt          | gacaactgacacagtaaaggaagggtg      |
| Exon 13                 | tgcgttctgtagatgaggagactgc            | gaatgaagctctaattggtggaatctca     |
| Exon 14                 | aatgccaggcactgaaacagta               | gatttagctctgaacactcactgcc        |
| <i>RNA analysis</i>     |                                      |                                  |
| Primer name             |                                      |                                  |
| CMAH-5UTR               |                                      | tgacagaccttccgtctaaatcttc        |
| CMAH-1F                 | atgctccttgagttcccttgact              |                                  |
| CMAH-2F                 | gagcaccatgaaatacgtcaatcc             |                                  |
| CMAH-3F                 | tccaatattggcagcaggtaga               |                                  |
| CMAH-4F                 | aaatgacccaatgaactcaataatctt          |                                  |
| CMAH-3UTR               | ggacgactgtatataggattccaaac           |                                  |
| CMAH-1R                 |                                      | cattttctcatccatttcaacaactag      |
| CMAH-2R                 |                                      | agtccactgtattaagtatcttatgaccttt  |
| CMAH-3R                 |                                      | tctatgatgcccttgcctgtctgt         |
| CMAH-4R                 |                                      | aaaacaggtgatggtatatgtcaggac      |
| <i>Genotyping</i>       |                                      |                                  |
| Primer name             |                                      |                                  |
| FAM-CMAHdelF            | tgagcaaaaggatcagatctaaacg            |                                  |
| CMAHdelR                |                                      | aaatgcacgctctgcttgct             |
| FAM-364F                | FAM-cgtgtttgtgtgaatacgtg             |                                  |
| 364wtR                  |                                      | tgggttctgaatccAaggg              |
| 364affectedR            |                                      | gtttctttgggttctgaatcTcagga       |
| CMAH ex2 F              | <u>Biotin-gaagaccggcaaaagatttcat</u> |                                  |
| CMAH ex2 R              |                                      | <u>ctccttgatgcttgacac</u>        |
| CMAH ex2 Seq            |                                      | <u>acacgttcttgacagccctca</u>     |
| CMAH ex4 F              | gacccttttggtccagttgtg                |                                  |
| CMAH ex4 R              |                                      | Biotin-cacttctccaaaagccaaatggt   |
| CMAH ex4 Seq            | cttttacttctagaactgaatcctccaat        |                                  |

\*Primers used at the University of Missouri to genotype c.142G>A variant. <sup>§</sup>Primers used at the University of Missouri to genotype c.364C>T variant.
